- A-357** Room C, 10/17/2000 9:00 AM - 11:00 AM (PS)  
**Redistribution Hypothermia Correlates with the Threshold for Thermoregulatory Vasoconstriction in Patients Anesthetized with Isoflurane or Xenon but Not Nitrous Oxide** Takabisa Goto, MD; Takashi Matsukawa, MD; Daniel I. Sessler, MD; Makoto Ozaki, MD; Shigeo Morita, MD, Teikyo University Ichihara Hospital, Ichihara-sbi, Japan
- A-358** Room C, 10/17/2000 9:00 AM - 11:00 AM (PS)  
**Thrombin Reduces Fluid Leak Through Punctured Dura Mater in an *In Vitro* Model** Dario A. Grisales, MD; Dan Paoli, MD; Conny Frosth, MD; Rebana Nawab, MD, Anesthesiology, University of South Florida College of Medicine, Tampa, FL, United States. Thrombin patch significantly decreases a durotomy fluid leak at hydrostatic pressure up to 30 cmH<sub>2</sub>O.
- A-359** Room C, 10/17/2000 9:00 AM - 11:00 AM (PS)  
**Increased Endothelial Cell Turnover in Human Cerebral Arteriovenous Malformations** Tomoki Hashimoto, MD; Ricardo Mesa-Tejada, MD; Christopher M. Quick, PhD; Andrew W. Bollen, MD, DVM; William L. Young, MD, Departments of Anesthesia, Neurology, Neurosurgery, and Pathology, University of California, San Francisco, San Francisco, CA, United States. Mitogenesis (Ki-67) is greater in AVMs than normal brain endothelium.
- A-360** Room C, 10/17/2000 9:00 AM - 11:00 AM (PS)  
**Abnormal Expression of Angiopoietin-2 and Tie-2 in Human Cerebral Arteriovenous Malformations** Tomoki Hashimoto, MD; Charles W. Emala, MD; Nancy J. Boudreau, PhD; Christopher M. Quick, PhD; William L. Young, MD, Dpts. of Anesthesia, Neurology, Neurosurgery and Surgery, University of California, San Francisco, CA, United States. Angiopoietin-2 and Tie-2 expression were abnormal in cerebral AVMs.
- A-361** Room C, 10/17/2000 9:00 AM - 11:00 AM (PS)  
**Propofol Versus Sevoflurane Anesthesia: Influence on Cerebral and Aortic Blood Flow Velocities** Andrea Holzer, M.D.; Josef Stark, M.D.; Manfred Greber, M.D.; Andrew Donner, M.D.; Udo M. Illievich, M.D., Anesthesiology and General Intensive Care, University of Vienna, Vienna, Austria. We compared cerebral and systemic blood flow velocities in awake and anesthetized (propofol-sevoflurane) patients.
- A-362** Room C, 10/17/2000 9:00 AM - 11:00 AM (PS)  
**In Non-Human Primates Intracarotid Adenosine -Not Nitroprusside- Profoundly Increases Cerebral Blood Flow** Shailendra Joshi, M.D.; Beverly Aagaard, M.D.; John Pile-Spellman, M.D.; Adam Libow, B.A.; Sulli J. Popilskis, DVM, Anesthesiology, Columbia University, New York, NY., Intracarotid adenosine -not nitroprusside- in doses which lack systemic side-effects, profoundly increases CBF of baboons.
- A-363** Room C, 10/17/2000 9:00 AM - 11:00 AM (PS)  
**In Humans and Non-Human Primates Intracarotid Nitroprusside Does Not Augment Cerebral Blood Flow** Shailendra Joshi, MD; William L. Young, MD; John Pile-Spellman, MD; Hoang Duong, MD; Beverly Aagaard, MD, Anesthesiology, Columbia University, New York, NY., Intracarotid nitroprusside, an endothelium independent nitric-oxide donor, failed to augment cerebral blood flow in humans and baboons.
- A-364** Room C, 10/17/2000 9:00 AM - 11:00 AM (PS)  
**Transcranial Doppler Ultrasonography with Induction of Anesthesia and Neuromuscular Blockade in Surgical Patients** W. Andrew Kofke, MD; Julie McWhorter, BS; Natalie Shabeen, BS; Elizabeth Sinz, MD, Anesthesiology, West Virginia University, Morgantown, WV, United States
- A-365** Room C, 10/17/2000 9:00 AM - 11:00 AM (PS)  
**Pre-Incubation of Vascular Rings with Iohexol Does Not Affect cGMP Response to Nitroprusside** Adam D. Libow, B.A.; Shailendra Joshi, M.D.; Lena S. Sun, M.D.; Carol A. Hirschman, M.D.; William Mack, B.A., Anesthesiology, Columbia University, New York, NY., Compared to equiosmotic concentrations of mannitol, iohexol did not impair cGMP generation in arterial rings after nitroprusside exposure.
- A-366** Room C, 10/17/2000 9:00 AM - 11:00 AM (PS)  
**Influence of Early Factors on Long-Term Head Injury Outcome** Colin Mackenzie; Shiu Ho; Nafeesa Jawed; Pat Dischinger; Michael Makely, National Study Center for Trauma & EMS and Shock Trauma Center, University of MD, Baltimore, MD, United States. Traumatic brain injury patients requiring pre-hospital intubation had the same Glasgow Coma Scale (GCS) as non-intubated patients on discharge at 33 days despite their greater admission Injury Severity Score (ISS) and lower admission GCS. Postvite admission blood alcohol had no effect on outcome status.
- A-367** Room C, 10/17/2000 9:00 AM - 11:00 AM (PS)  
**Bupirone and Meperidine Synergistically Reduce the Shivering Threshold** Masoud Mokhtarani, MD; Adel N. Mahgob, MD; Nobu Morioka, MD; Anthony Doufas, MD; Daniel I. Sessler, MD, Outcomes Research, Dept. of Anesthesia, UCSF, San Francisco, CA, United States. Bupirone and meperidine synergistically reduce the shivering threshold to 33°C while causing little sedation or respiratory toxicity.
- A-368** Room C, 10/17/2000 9:00 AM - 11:00 AM (PS)  
**Remifentanyl Versus Alfentanil: Effect on Systemic Circulation and Cerebral Blood Flow in Neurosurgical Patients in the Sitting Position** Bart M.B. Monteyne, MD; Jozef Van Aken, PhD; Michel M.R.F. Struys, PhD; Jacques Caemaert, PhD; Gaspard P.F. De Ley, PhD, Anesthesia, University Hospital, Gent, Belgium. Remifentanyl is an alternative to alfentanil to maintain CBF in the sitting position.
- A-369** Room C, 10/17/2000 9:00 AM - 11:00 AM (PS)  
**A Large Dose of Amino Acids Prevent Core Hypothermia Even during Abdominal Surgery** Chibaru Negishi, M.D.; Daniel I. Sessler, M.D.; Kenji Atarashi, M.D.; Takashi Matsukawa, M.D.; Hidehiro Suzuki, M.D., Anesthesiology, Tokyo Women's Medical University, Shinjuku, Tokyo, Japan. Amino acids prevent most core hypothermia. Prevention was dose-dependent, with 0.4 and 0.6 g/kg/h providing most benefit.
- A-370** Room C, 10/17/2000 9:00 AM - 11:00 AM (PS)  
**Effect of Therapeutic Blood-Brain Barrier Disruption on Cerebrospinal Fluid Homeostasis** Misha Perouansky, MD; Lev Ronin, MD; Arieh Eden-Openheim; Tal Siegal; Yoram G. Weiss, Anesthesiology, "Hadassah" Medical Center - Hebrew University School of Medicine, Jerusalem, Israel. Mechanisms other than the BBB contribute to maintaining CSF/Blood gradients.
